# Supplementary material for: Genetic Evidence of Multiple Introductions of Lumpy Skin Disease Virus into Saratov Region, Russia
Source: MDPI journal article supplement (doi:10.3390/pathogens10060716), 2021-06-07
Supplement: s1 [file s1]

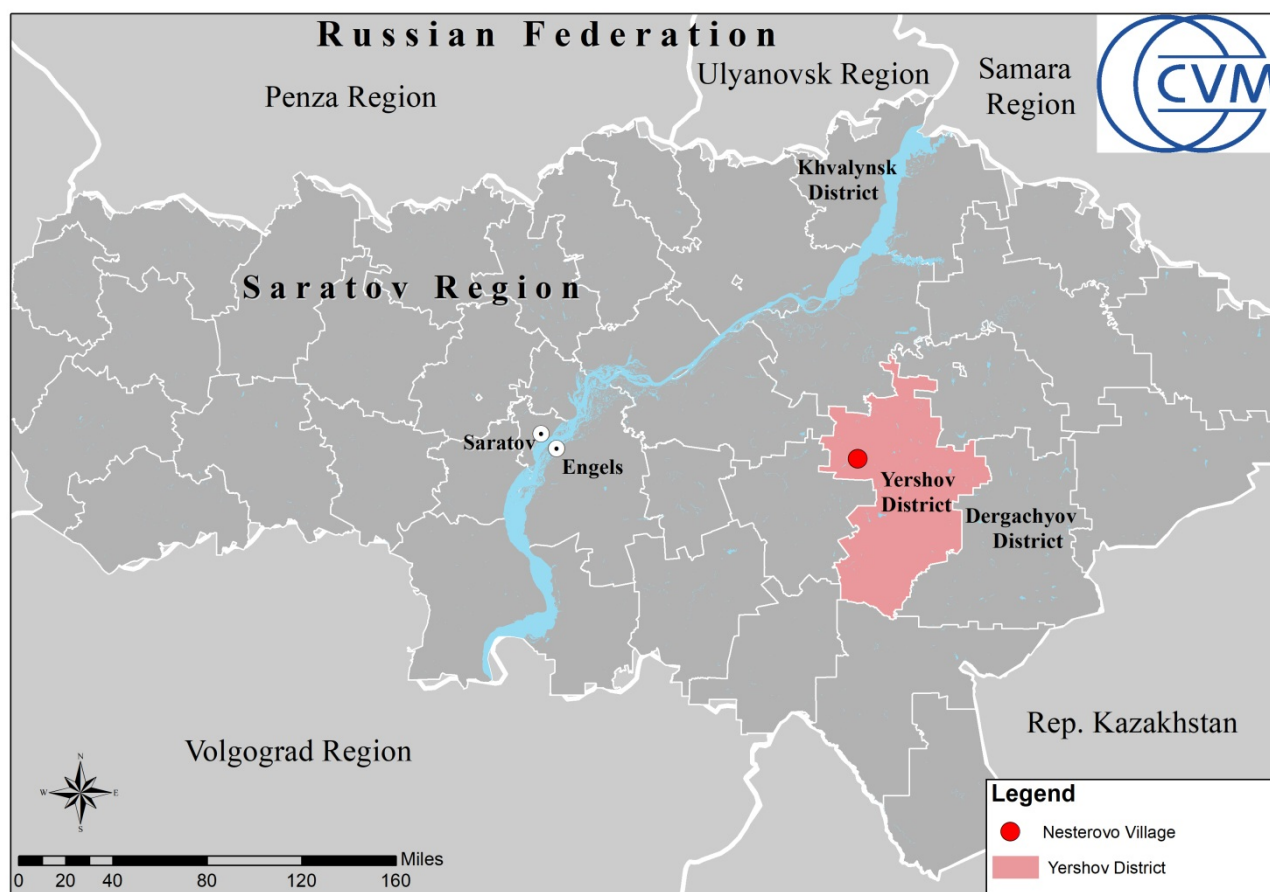

**Figure S1.** Location of the study area is in the Saratov Region which is colored in dark grey. Ershov District is highlighted in pink with Nesterovo Village labeled as a red dot. The Regions of Russian Federation in close proximity with Saratov Region are in grey; the territory of the Republic of Kazakhstan is in light grey.

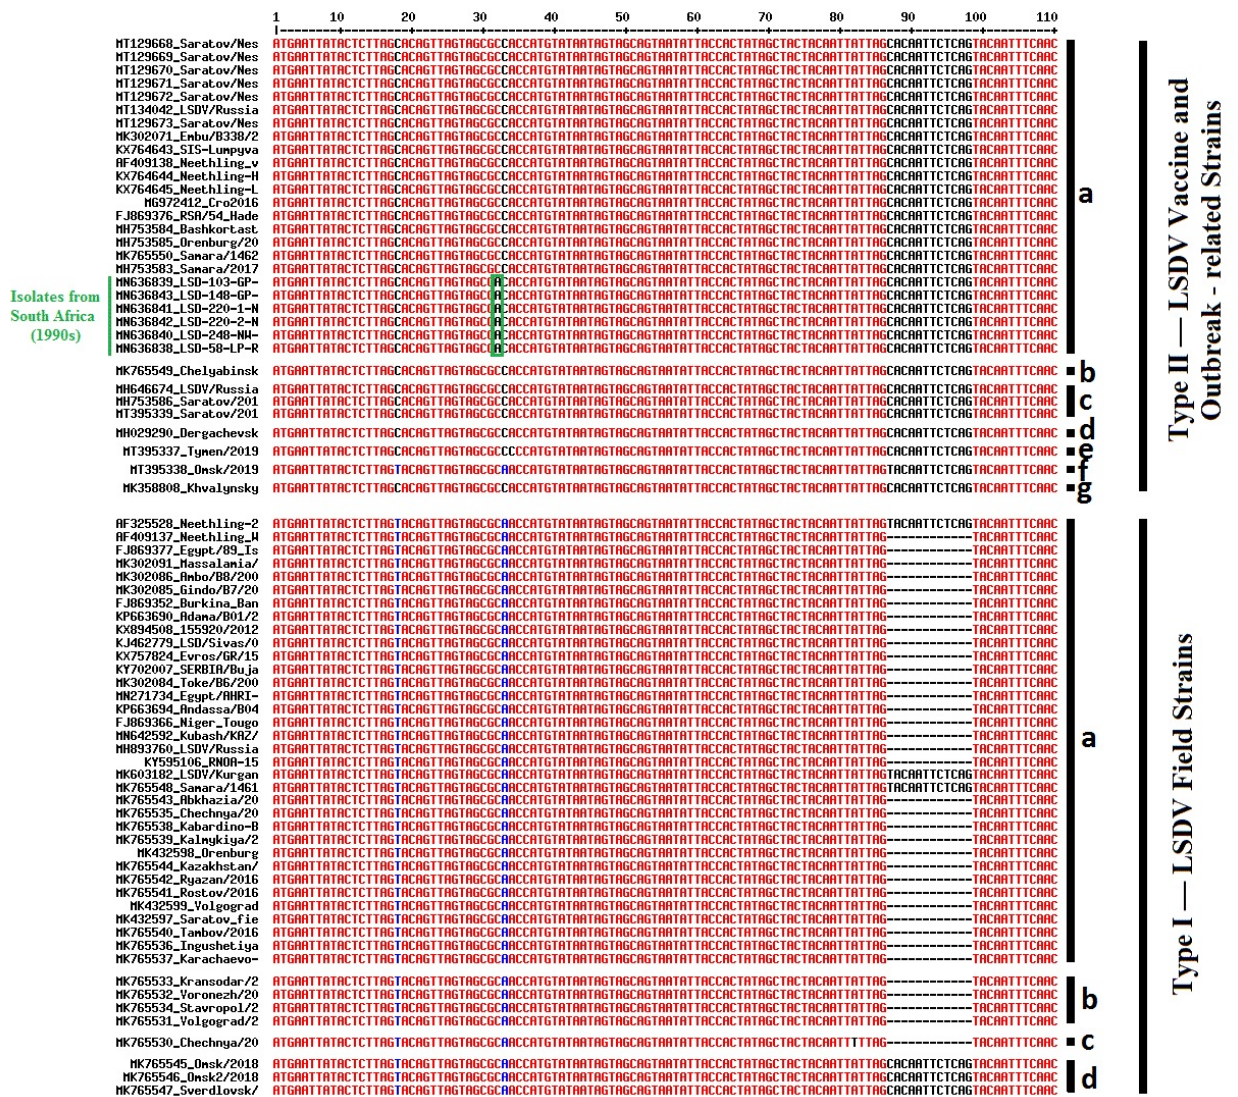

**Figure S2.** Multiple sequence alignment of the LSDV GPCR gene sequences derived from the LSDV strains detected in Saratov Region in 2019 (Nesterovo-2019) and the GPCR gene sequences of other LSDV strains available at the NCBI database (<https://www.ncbi.nlm.nih.gov/>) and presented in Table S1 and Table S2 in Supplementary Material. The sequences were divided into eleven Subtypes with four groups belonging to Type I (Subtypes a-d), and seven groups forming Type II (Subtypes a-g). The SNP in position 32 in the LSDV GPCR gene sequences derived from the South Africa LSDV isolates in 1990s is highlighted as the green frame.

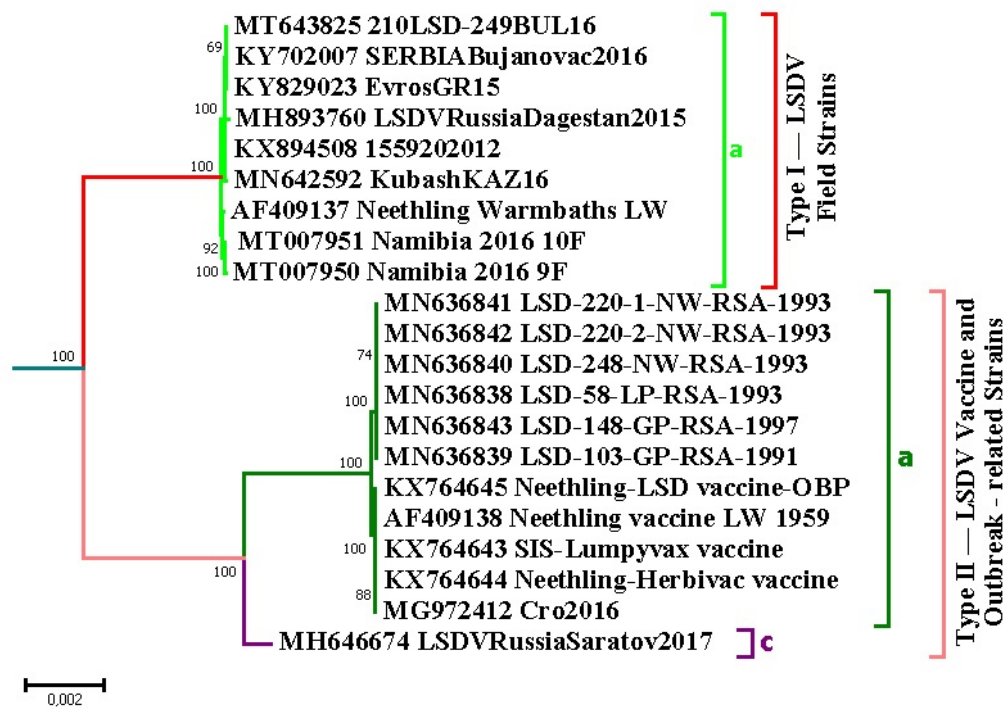

**Figure S3.** The phylogenetic tree of the LSDV strains of Types Ia and IIa,c. The picture was constructed based on the polymorphisms of the LSDV whole genome sequences obtained from the NCBI database, <https://www.ncbi.nlm.nih.gov/>. The tree was generated using the Neighbor-Joining method in MEGA 7 (25) with branch lengths in the same units as those of the evolutionary distances used to infer the phylogenetic tree. The evolutionary distances were computed using the Maximum Composite Likelihood method (27) and are in the units of the number of base substitutions per site. The LSDV strains of different Types/Subtypes are highlighted by the color square brackets: light green for Ia (LSDV Field Strains), dark green – IIa and burgundy – IIc (LSDV vaccine and outbreak-related strains).

**Table S1.** List of the LSDV strains available in GenBank used in this study.

| ## | STRAIN NAME                 | GENBANK ACCESSION | COLLECTION DATE | HOST       | COUNTRY                     |
|----|-----------------------------|-------------------|-----------------|------------|-----------------------------|
| 1  | Bashkortastan/2017          | MH753584          | 09/2017         | Cattle     | Russia                      |
| 2  | Chechnya/2015               | MK765530          | -N/A-           | Unknown    | -N/A-                       |
| 3  | Chechnya/2016               | MK765535          | -N/A-           | Unknown    | -N/A-                       |
| 4  | Chelyabinsk/2018            | MK765549          | -N/A-           | Unknown    | -N/A-                       |
| 5  | Dergachevskiy               | MH029290          | 06/2017         | Cattle     | Russia                      |
| 6  | Kabardino-Balkariya/2016    | MK765538          | -N/A-           | Unknown    | -N/A-                       |
| 7  | Kalmykiya/2016              | MK765539          | -N/A-           | Unknown    | -N/A-                       |
| 8  | Karachaevo-Cherkessiya/2016 | MK765537          | -N/A-           | Unknown    | -N/A-                       |
| 9  | Khvalynsky                  | MK358808          | 09/2018         | Cattle     | Russia                      |
| 10 | Kransodar/2016              | MK765533          | -N/A-           | Unknown    | -N/A-                       |
| 11 | Ingushetiya/2016            | MK765536          | -N/A-           | Unknown    | -N/A-                       |
| 12 | LSDV/Kurgan/2018            | MK603182          | -N/A-           | Unknown    | -N/A-                       |
| 13 | LSDV/Russia/Dagestan/2015   | MH893760          | 2015            | Bos taurus | Russia                      |
| 14 | LSDV/Russia/Saratov/2017    | MH646674          | 2017            | Bos taurus | Russia                      |
| 15 | Omsk/2018                   | MK765545          | -N/A-           | Unknown    | -N/A-                       |
| 16 | Omsk2/2018                  | MK765546          | -N/A-           | Unknown    | -N/A-                       |
| 17 | Orenburg                    | MK432598          | 2017            | Cow        | Russia                      |
| 18 | Orenburg/2017               | MH753585          | 12/2017         | Cattle     | Russia                      |
| 19 | RNOA-15                     | KY595106          | 10/2015         | Cattle     | Russia North Ossetia-Alania |
| 20 | Rostov/2016                 | MK765541          | -N/A-           | Unknown    | -N/A-                       |
| 21 | Ryazan/2016                 | MK765542          | -N/A-           | Unknown    | -N/A-                       |
| 22 | Samara/1461/2018            | MK765548          | -N/A-           | Unknown    | -N/A-                       |
| 23 | Samara/1462/2018            | MK765550          | -N/A-           | Unknown    | -N/A-                       |
| 24 | Samara/2017                 | MH753583          | 07/2017         | Cattle     | Russia                      |
| 25 | Saratov/2017                | MH753586          | 07/2017         | Cattle     | Russia                      |
| 26 | Saratov_field/2017          | MK432597          | 2017            | Cattle     | Russia                      |
| 27 | Stavropol/2016              | MK765534          | -N/A-           | Unknown    | -N/A-                       |
| 28 | Sverdlovsk/2018             | MK765547          | -N/A-           | Unknown    | -N/A-                       |
| 29 | Tambov/2016                 | MK765540          | -N/A-           | Unknown    | -N/A-                       |
| 30 | Volgograd                   | MK432599          | 2017            | Cow        | Russia                      |

|    |                                       |          |            |            |            |
|----|---------------------------------------|----------|------------|------------|------------|
| 31 | Volgograd/2016                        | MK765531 | -N/A-      | Unknown    | -N/A-      |
| 32 | Voronezh/2016                         | MK765532 | -N/A-      | Unknown    | -N/A-      |
| 33 | LSDV/Russia/Udmurtiya/2019            | MT134042 | 03/03/2019 | Cattle     | Russia     |
| 34 | Omsk/2019                             | MT395338 | 2019       | Cattle     | Russia     |
| 35 | Saratov/2019                          | MT395339 | 2019       | Cattle     | Russia     |
| 36 | Saratov/Nesterovo-<br>30614/2019/bl_1 | MT129669 | 2019       | Cattle     | Russia     |
| 37 | Saratov/Nesterovo-<br>30614/2019/n_1  | MT129668 | 2019       | Cattle     | Russia     |
| 38 | Saratov/Nesterovo-<br>30839/2019/bl_2 | MT129671 | 2019       | Cattle     | Russia     |
| 39 | Saratov/Nesterovo-<br>30839/2019/n_2  | MT129670 | 2019       | Cattle     | Russia     |
| 40 | Saratov/Nesterovo-<br>30840/2019/bl_3 | MT129673 | 2019       | Cattle     | Russia     |
| 41 | 30840/2019/n_3                        | MT129672 | 2019       | Cattle     | Russia     |
| 42 | Tymen/2019                            | MT395337 | 2019       | Cattle     | Russia     |
| 43 | Kazakhstan/2016                       | MK765544 | -N/A-      | Unknown    | -N/A-      |
| 44 | Kubash/KAZ/16                         | MN642592 | 07/07/2016 | Bos taurus | Kazakhstan |
| 45 | Abkhazia/2016                         | MK765543 | -N/A-      | Unknown    | -N/A-      |
| 46 | Adama/B01/2011                        | KP663690 | 10/02/2011 | Cattle     | Ethiopia   |
| 47 | Andassa/B04/2012                      | KP663694 | 10/11/2012 | Cattle     | Ethiopia   |
| 48 | Massalamia/P04/1971                   | MK302091 | 1971       | Cattle     | Sudan      |
| 49 | Evros/GR/15                           | KX757824 | 08/18/2015 | Cattle     | Greece     |
| 50 | Embu/B338/2011                        | MK302071 | 2011       | Cattle     | Kenya      |
| 51 | Neethling 2490                        | AF325528 | -N/A-      | Unknown    | Kenya      |
| 52 | Egypt/AHRI-1/Minya/2016               | MN271734 | 2016       | Cattle     | Egypt      |
| 53 | Egypt/89 Ismalia isolate LSDV18       | FJ869377 | 1989       | Cattle     | Egypt      |
| 54 | 155920/2012                           | KX894508 | 12/19/2012 | Cattle     | Israel     |
| 55 | LSD/Sivas/0114/TUR                    | KJ462779 | 01/06/2014 | Cattle     | Turkey     |
| 56 | Gindo/B7/2008                         | MK302085 | 2008       | Cattle     | Tanzania   |
| 57 | Ambo/B8/2008                          | MK302086 | 2008       | Cattle     | Tanzania   |
| 58 | Toke/B6/2008                          | MK302084 | 2008       | Cattle     | Tanzania   |



|    |                                |          |            |            |              |
|----|--------------------------------|----------|------------|------------|--------------|
| 59 | SERBIA/Bujanovac/2016          | KY702007 | 06/07/2016 | Cattle     | Serbia       |
| 60 | Neethling Warmbaths LW         | AF409137 | -N/A-      | Cattle     | South Africa |
| 61 | RSA/54 Haden isolate LSDV17    | FJ869376 | 1954       | Cattle     | South Africa |
| 62 | Niger Tougounous isolate LSDV7 | FJ869366 | -N/A-      | Cattle     | Niger        |
| 63 | Burkina Banfora isolate LSDV5  | FJ869352 | -N/A-      | Cattle     | Burkina Faso |
| 64 | Neethling vaccine LW 1959      | AF409138 | -N/A-      | -N/A-      | South Africa |
| 65 | Neethling-Herbivac vaccine     | KX764644 | -N/A-      | Bos taurus | South Africa |
| 66 | Neethling-LSD vaccine-OBP      | KX764645 | -N/A-      | Bos taurus | South Africa |
| 67 | SIS-Lumpyvax vaccine           | KX764643 | 1999       | Bos taurus | South Africa |
| 68 | LSD-103-GP-RSA-1991            | MN636839 | 1991       | Bos taurus | South Africa |
| 69 | LSD-148-GP-RSA-1997            | MN636843 | 1997       | Bos taurus | South Africa |
| 70 | LSD-220-1-NW-RSA-1993          | MN636841 | 1993       | Bos taurus | South Africa |
| 71 | LSD-220-2-NW-RSA-1993          | MN636842 | 1993       | Bos taurus | South Africa |
| 72 | LSD-248-NW-RSA-1993            | MN636840 | 1993       | Bos taurus | South Africa |
| 73 | LSD-58-LP-RSA-1993             | MN636838 | 1993       | Bos taurus | South Africa |
| 74 | Cro2016                        | MG972412 | 2016       | Cattle     | Croatia      |
| 75 | Abu Gharib (Sheeppox virus)    | MN072626 | -N/A-      | Sheep      | Iraq         |
| 76 | Jaipur (Sheeppox virus)        | MG000156 | 1981       | Sheep      | India        |
| 77 | FZ (Goatpox virus)             | KC951854 | 01/10/2012 | Goat       | China        |
| 78 | India (Goatpox virus)          | MN072620 | -N/A-      | Goat       | -N/A-        |

---

**Table S2.** Typing and Subtyping of the LSDV strains based on the coding region of the GPCR gene.

[illegible]

## III

**d**

<sup>1</sup> N – Not determined, this part of the sequence is not available in the GenBank

<sup>1</sup> N – Not determined, this part of the sequence is not available in the GenBank
